# Supplementary material for: Robust microfluidic construction of hybrid microfibers based on konjac glucomannan and their drug release performance
Source: Royal Society of Chemistry journal article supplement (doi:10.1039/c8ra05600e), 2018-01-01
Supplement: c8ra05600e1.pdf [file c8ra05600e1.pdf]

*Supporting Information*

**Robust microfluidic construction of hybrid microfibers based on konjac glucomannan and their drug release performance**

*Yongsheng Ni,<sup>a</sup> Wanmei Lin,<sup>a</sup> Ruo-Jun Mu,<sup>a</sup> Chunhua Wu,<sup>a</sup> Lin Wang,<sup>a</sup> Dan Wu,<sup>a</sup> Su Chen<sup>\*b</sup> and Jie Pang<sup>\*a</sup>*

<sup>a</sup> College of food science, Fujian Agriculture and Forestry University, Fuzhou, China, 350002

<sup>b</sup> State Key Laboratory of Materials-Oriented Chemical Engineering, College of Chemical Engineering, Jiangsu Key Laboratory of Fine Chemicals and Functional Polymer Materials, Nanjing Tech University (former Nanjing University of Technology), Nanjing 210009, China

## Supporting Figures

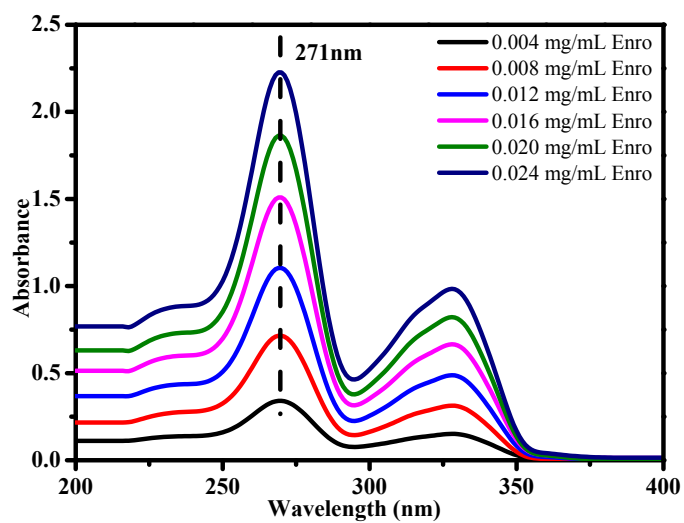

Figure S1. The UV-vis characteristic spectra of Enro in different concentrations.

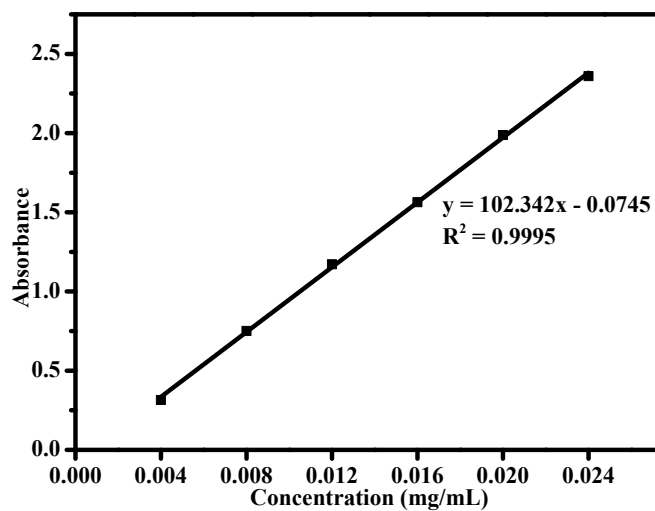

Figure S2. Standard curves of Enro in PBS (pH  $7.4 \pm 0.2$ ).
